# Supplementary material for: High interannual surface pCO 2 variability in the Southern Canadian Arctic Archipelago's Kitikmeot Sea
Source: Copernicus journal article supplement (doi:10.5194/egusphere-2022-710), 2022-08-04
Supplement: Supplementary file 1 [file Read me for supplement files.docx]

Read me for supplement files

**This supplement includes the supplement word document titled**

Sims_et_al_2022_Kitikmeot pco2_v1.3_2022-07-20_supplement.docx

This document includes supplementary text, tables and figures.

**Scripts for loading in and processing the underway data are titled found in Processing scripts directory**

Bergmann_2016_underway.m

Bergmann_2017_underway.m

Bergmann_2018_underway.m

Bergmann_2019_underway.m

**Scripts for plotting and synthesising the processed data are titled found in Plotting scripts directory**

plot_Berg_underway_data.m

**The raw data files from instrument sensors for each year are provided in the following files are found in Raw data directory**

2016_und.mat

2017_und.mat

2018_und.mat

2019_und.mat

**The processed data files from instrument sensors for each year are provided in the following files in Processed data directory**

2016_undpCO2_proc.mat

2017_undpCO2_proc.mat

2018_undpCO2_proc.mat

2019_und pCO2_proc.mat

**The temperature calibration data for 2017 and 2018 found in Temperature calibration directory**

2017_temp_cal.mat

2017_temp_cal.mat

**The pCO2 and wind data from the tower can be found in EC tower directory**

pco2.mat

wind_data_rich.mat
